# Supplementary material for: Electrochemical surface reconstructed Ptx(x=2,3)Si/PtSi/p-Si photocathodes for achieving high efficiency in photoelectrochemical H2 generation
Source: Royal Society of Chemistry journal article supplement (doi:10.1039/d1ta09346k), 2022-01-01
Supplement: d1ta09346k1.pdf [file d1ta09346k1.pdf]

## Supporting information

### Electrochemical Surface Reconstructed $\text{Pt}_{x(x=2,3)}\text{Si}/\text{PtSi}/\text{p-Si}$ Photocathodes for Achieving High Efficiency in Photoelectrochemical $\text{H}_2$ Generation

*Haoyue Zhang,<sup>a,c</sup> Guangwei She,<sup>a\*</sup> Jing Xu,<sup>b</sup> Shengyang Li,<sup>a,c</sup> Yun Liu,<sup>d</sup> Jun Luo<sup>b\*,c</sup>  
and Wensheng Shi<sup>a,c,e</sup>*

<sup>a</sup> Key Laboratory of Photochemical Conversion and Optoelectronic Materials,  
Technical Institute of Physics and Chemistry, Chinese Academy of Sciences, Beijing  
100190, China

<sup>b</sup> Key Laboratory of Microelectronic Devices & Integrated Technology, Institute of  
Microelectronics, Chinese Academy of Sciences, Beijing 10009, China

<sup>c</sup> University of Chinese Academy of Sciences, Chinese Academy of Sciences, Beijing  
100049, China

<sup>d</sup> Research School of Chemistry, The Australian National University, Canberra, ACT  
2601, Australia

<sup>e</sup> Ganjiang Innovation Academy, Chinese Academy of Sciences, Ganzhou 341000,  
China

---

## Supplementary Notes

### Structural characterization measurements

TEM, HRTEM and HAADF-TEM were executed with a JEOL analytic transmission electron microscope with *in-situ* double spherical aberration correction (JEM-ARM300F).

GI-XRD was executed with a Bruker D8 Discover using Cu K $\alpha$  radiation, operating at 40 kV and 40 mA. And the glancing angle was 0.5 °.

XPS spectra of Pt 4f were performed on Thermofisher Scientific ESCALAB 250Xi with an Al K-alpha X-ray source. The measurement parameters were as mentioned below: spot size of 650  $\mu\text{m}$ ; pass energy of 30 eV; energy step of 0.1 eV; dwell time of 34.6 s; 3 scans. The peak energies were calibrated with the C 1s peak binding energy, which was calibrate to be 284.8 eV.

SIMS was executed with an elemental and isotopic Microanalysis equipment CAMECA sims 4500.

### Mott-Schottky measurements

In order to conduct the Mott-Schottky measurements, the photocathodes were encapsulated to solid-state cells. First, the samples were cut into  $1 \times 0.5 \text{ cm}^2$  size slices. Then, the p-Si back was covered by InGa eutectic layer to create ohmic contact. And a Cu foil was contacted to the InGa eutectic layer as the counter and reference electrode after fixed by epoxy resin. Elargol was smeared evenly on the front of the sample to make favorable conductivity as the working electrode. The Mott-Schottky plots of the solid-state cells were measured in dark with the AC potential frequency of 100 kHz on the CHI660C workstation.<sup>1</sup>

### Calculation of SBH and ABPE

The SBH ( $\phi_b$ ) was calculated by the following equation according to the

illustration of energy band structure shown in Fig. S1:

$$\phi_{bp} = E_{fb} + V_p$$

where  $E_{fb}$  is the flat band potential, which could be obtained from following equation:

$$E_{fb} = b + \frac{KT}{q}$$

where b is the x-axis intercept of the Mott-Schottky plots linear fitting line from Fig. 2a, which is 0.65 eV. K is Boltzmann constant  $1.38 \times 10^{-23}$  J K<sup>-1</sup>, T is temperature 300 K and q is elementary charge quantity  $1.602 \times 10^{-19}$  C. So  $E_{fb}$  could be calculated to 0.67 eV.

$V_p$  is the energy difference between the maximum of the p-Si valence band and Fermi level.  $V_p$  was obtained from following equation:

$$V_p = \frac{KT}{q} \ln\left(\frac{N_v}{N_q}\right)$$

where  $N_v$  is the effective density of states in the p-Si valence band.  $N_v$  was obtained from following equation:

$$N_v = \frac{(2m_p^* k_0 T)^{\frac{3}{2}}}{4\pi^{\frac{2}{3}} \hbar^3}$$

In this equation  $m_p^*$  is the effective hole mass in the valence band of Si which could be measured as 0.59  $m_0$ .  $m_0$  is the electron mass  $9.110 \times 10^{-31}$  kg. And  $k_0$ ,  $\pi$  and  $\hbar$  are constants.  $k_0$  is Boltzmann constant and  $\hbar$  is reduced Planck constant  $\frac{h}{2\pi}$ . So  $N_v$  is related to the temperature which could be calculated to  $1.04 \times 10^{19}$  cm<sup>-3</sup> at 300 K .

$N_q$  is the dopant concentration of the p-Si which can be mensurated from the

slope  $\left[ \frac{d\left(\frac{1}{C^2}\right)}{dV} \right] - 0.9505 \times 10^{16}$  of the Mott-Schottky plots linear fitting line in Fig. 2a by the following equation:

$$N_q = \frac{2}{e\epsilon_0\epsilon} \left[ \frac{d\left(\frac{1}{C^2}\right)}{dV} \right]^{-1}$$

where  $e$  is the elementary charge quantity, while the vacuum dielectric constant  $\epsilon_0$  is  $8.85 \times 10^{-14}$  F cm<sup>-1</sup> and the relative dielectric constant ( $\epsilon$ ) is 11.68.<sup>1,2</sup>

The ABPE was calculated from the following equation:

$$ABPE = \frac{|J(\text{mA cm}^{-2}) \times V_{bias}(\text{V})}{P(\text{mW cm}^{-2})} \times 100\%$$

where  $J$  is the photocurrent density of the photocathode,  $V_{bias}$  is the bias potential vs. RHE, and  $P$  is the power of the illumination (100 mW cm<sup>-2</sup>).<sup>3</sup>

### Measurement of photovoltage

The photovoltage of the photocathode were measured in the same condition as the photoelectrochemical measurements. The photocathode was working electrode while a graphite rod electrode and an SCE electrode were used as the counter electrode and the reference electrode, respectively. The open-circuit potential ( $V_{ocp}$ ) of the photocathode was measured with different illumination condition. The photovoltage was calculated by the difference between the  $V_{ocp}$  with chopped illumination. (Fig. S4)

### Measurement of mass activity, EIS, IPCE and Faraday efficiency

According to the fabrication process in the experimental section, a Pt film with thickness of 8 nm was deposited on the p-Si. As the electrochemical activity area was 0.25 cm<sup>2</sup>, the volume of deposited Pt could be calculated to be  $2 \times 10^{-7}$  cm<sup>3</sup>. The density of Pt is 21.45 g cm<sup>-3</sup>. Therefore, the mass of deposited Pt could be calculated to be  $4.29 \times 10^{-6}$  g. The control sample Pt NP/NiSi<sub>2</sub>/p-Si was fabricated according to our previously reported procedure.<sup>4</sup> And the loading amount of Pt in the Pt NP/NiSi<sub>2</sub>/p-Si was estimated from the SEM image (Fig. S2d of Ref. 4). The particle size ranges from 14.89 to 70.50 nm with an average size of 35.63 nm. As the

---

deposition area is 0.25 cm<sup>2</sup>, the volume loading of Pt particle on NiSi<sub>2</sub> is 4.09 × 10<sup>-7</sup> cm<sup>3</sup> with the simplification of particles as hemisphere. Therefore, the mass loading of Pt in Pt NP/NiSi<sub>2</sub>/p-Si is about 8.76 × 10<sup>-6</sup> g.

Based on the mass calculated above, the electrocatalytic mass activities of the Pt<sub>x(x=2,3)</sub>Si/PtSi/p-Si and Pt NP/NiSi<sub>2</sub>/p-Si was investigated according to the formula below (Fig. S8):

$$\text{Mass activity} = \frac{I}{m_{\text{Pt}}}$$

which I is current,  $m_{\text{Pt}}$  is the mass of Pt.

The EIS of the photocathode were measured in the same condition as the photoelectrochemical measurements. The frequency range is 1 × 10<sup>5</sup> Hz to 25 Hz, and the ac amplitude is 5 mV.

The IPCE of the photocathode were measured at a bias of -0.256 V vs. RHE in 0.5 M H<sub>2</sub>SO<sub>4</sub> under the illumination in a range of 450 nm and 1000 nm. Under the illumination of a 500 W xenon lamp, the light of different wavelengths was generated through a monochromator (Beijing Hongyuan WDG30). The IPCE was calculated by the following formula, which is shown in Fig. S10a:

$$\text{IPCE} = \frac{1240 \times J}{\lambda \times P_{\text{light}}}$$

which J is electric current;  $\lambda$  is incident light wavelength and  $P_{\text{light}}$  is the power of incident light.

The mixed gas generated during the chronoamperometry test was collected by the drainage method. And the Faraday efficiency was calculated by the following formula:

$$\text{Faraday efficiency} = \frac{m \times n \times F}{I \times t}$$

which m is the mole number of the product, n is the number of reaction electron, F is Faraday constant 96485 C mol<sup>-1</sup>, I is electric current and t is reaction time.

The m could be calculated by the collection volume of mixed gas, and I×t could be calculated by the integration of chronoamperometry curve.



## Supplementary Figures

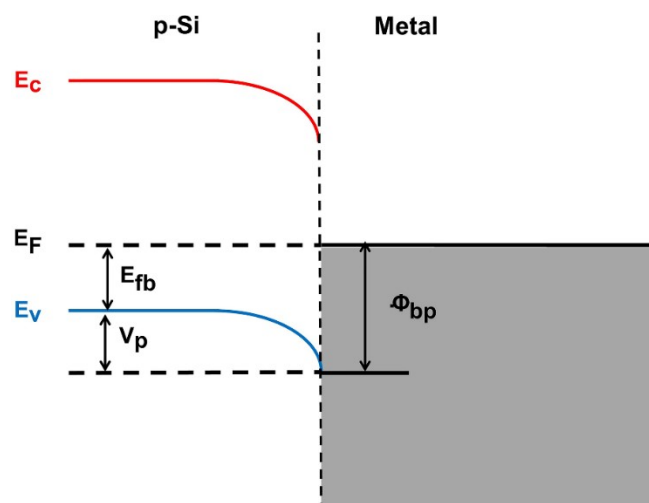

**p-Si/Metal**

**Fig. S1** Schematic illustration of energy band structure of a metal/p-Si Schottky junction.

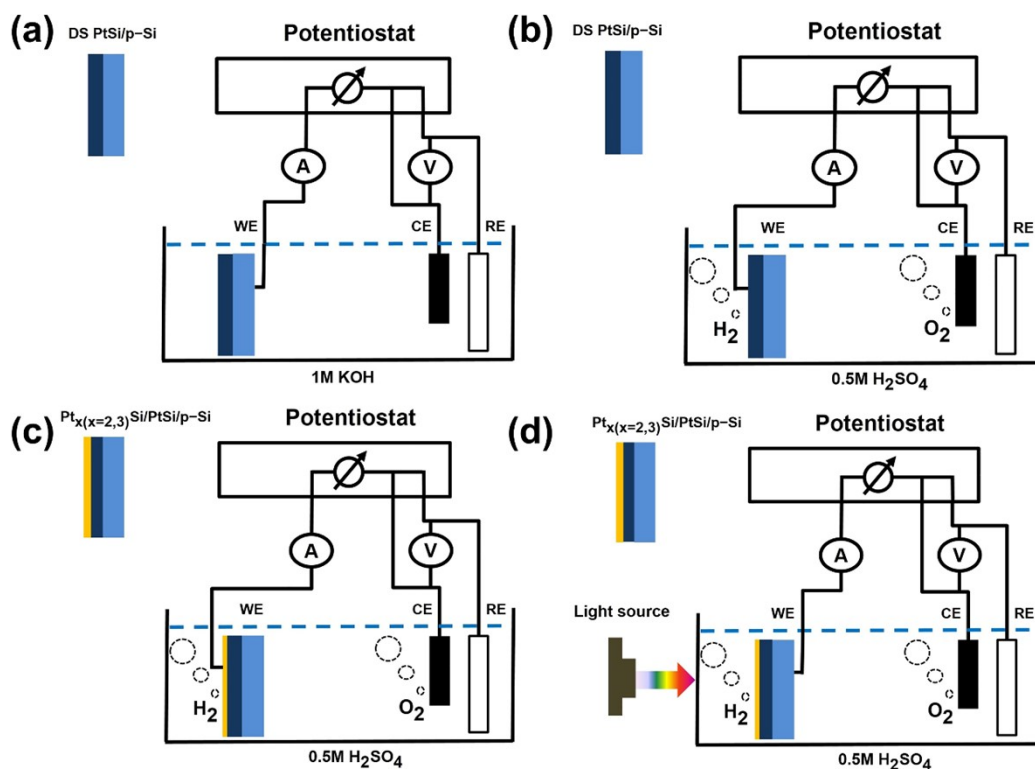

**Fig. S2** Schematic illustration of electrochemical surface reconstruction (ESR), electrochemical (EC) measurement and photoelectrochemical (PEC) measurement. (a) Schematic illustration of ESR on DS PtSi/p-Si; (b) Schematic illustration of EC measurement of the PtSi; (c) Schematic illustration of EC measurement of the  $\text{Pt}_{x(x=2,3)}\text{Si}$ ; (d) Schematic illustration of PEC measurement of  $\text{Pt}_{x(x=2,3)}\text{Si}/\text{PtSi}/\text{p-Si}$ .

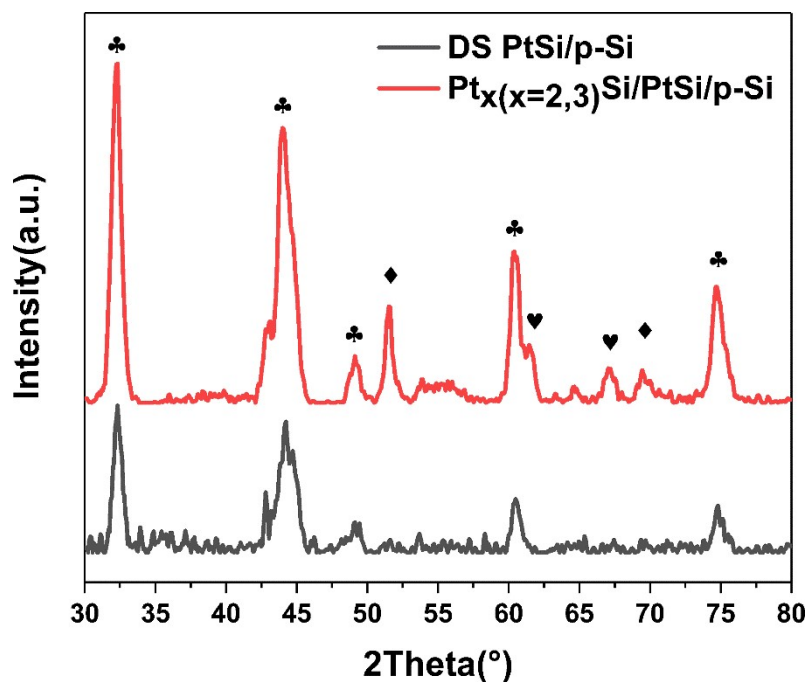

**Fig. S3** GI-XRD patterns of DS PtSi/p-Si (black) and  $\text{Pt}_{x(x=2,3)}\text{Si}/\text{PtSi}/\text{p-Si}$  (red), the characteristic peaks of PtSi ( $\clubsuit$  JCPDS#07-0251)  $\text{Pt}_2\text{Si}$  ( $\heartsuit$  JCPDS#17-0683) and  $\text{Pt}_3\text{Si}$  ( $\blacklozenge$  JCPDS#34-0956) were shown.

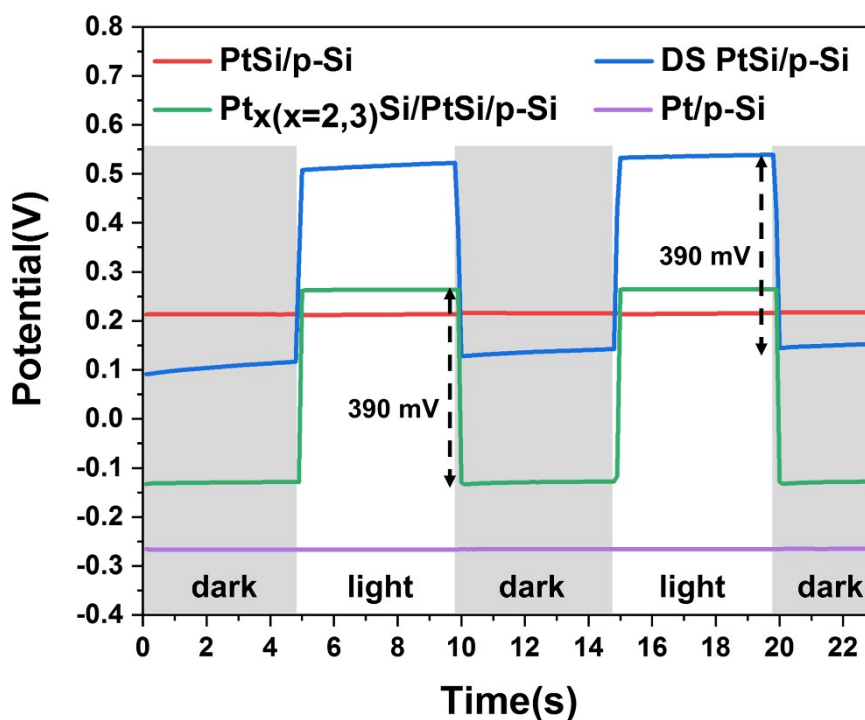

**Fig. S4** The  $V_{\text{opp}}$ -t curves of PtSi/p-Si (red), DS PtSi/p-Si (blue),  $\text{Pt}_{x(x=2,3)}\text{Si}/\text{PtSi}/\text{p-Si}$  (green) and Pt/p-Si (purple) in 0.5 M  $\text{H}_2\text{SO}_4$  recorded under chopped illumination.



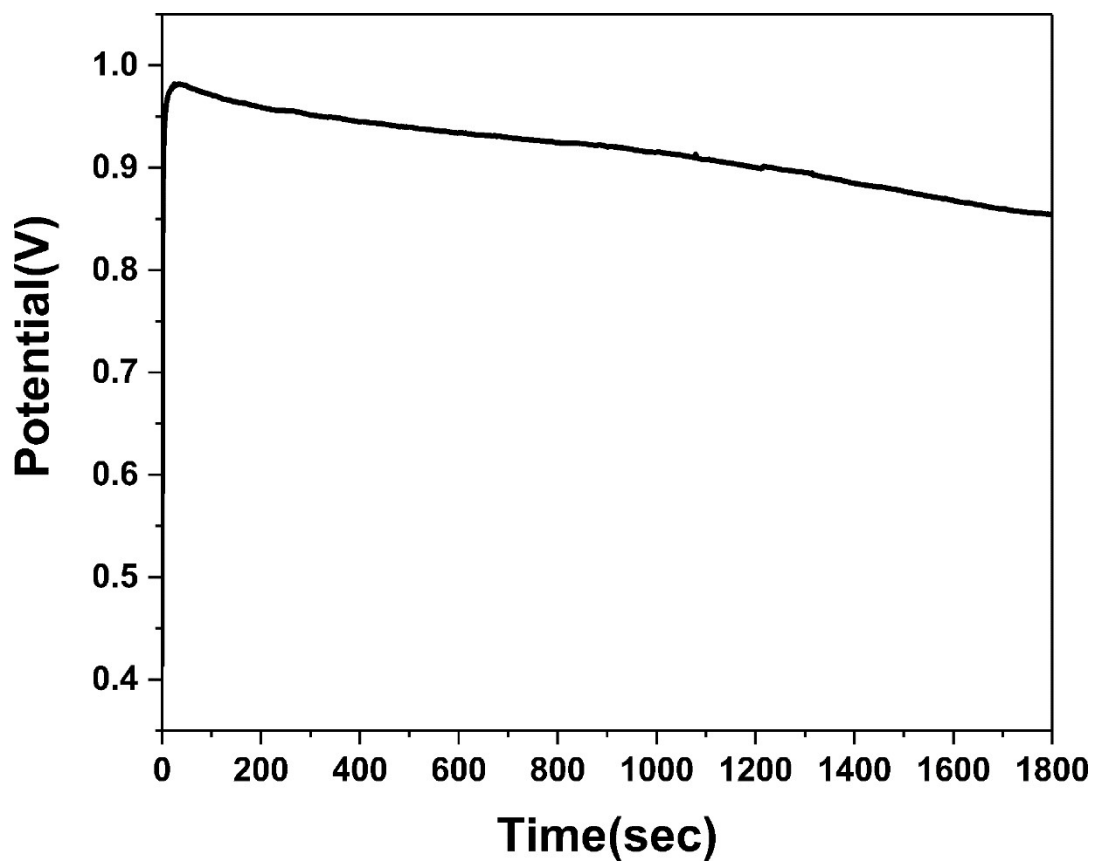

**Fig. S5** Chronopotentiometry of electrochemical surface reconstruction (ESR) at 0.01 mA for 30 minutes in 1 M KOH solution.

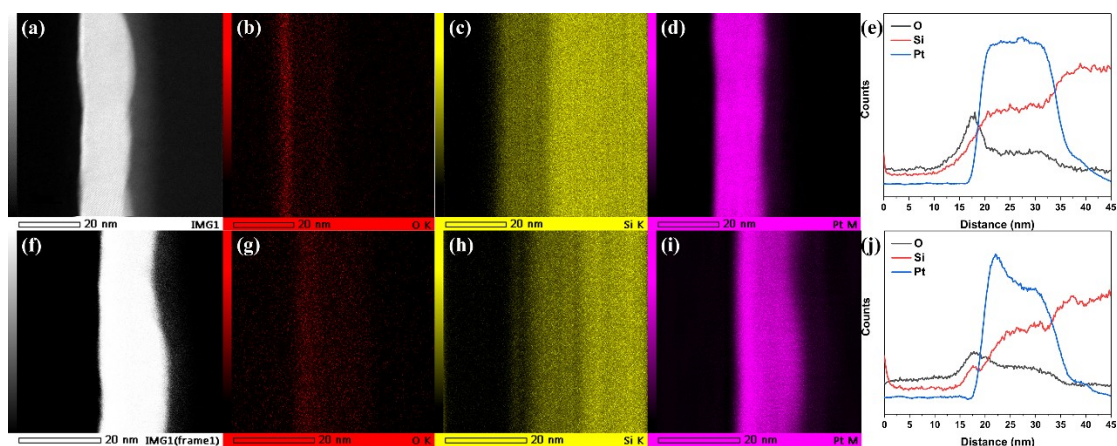

**Fig. S6** STEM images, EDS mapping images and EDS line scan curves of DS PtSi/p-Si (a-e) and Pt<sub>x(x=2,3)</sub>Si/PtSi/p-Si (f-j). (a): STEM image; (b) O, (c) Si, (d) Pt; (e) EDS line scan curves; (f) STEM image; (g) O, (h) Si, (i) Pt; (j) EDS line scan curves.

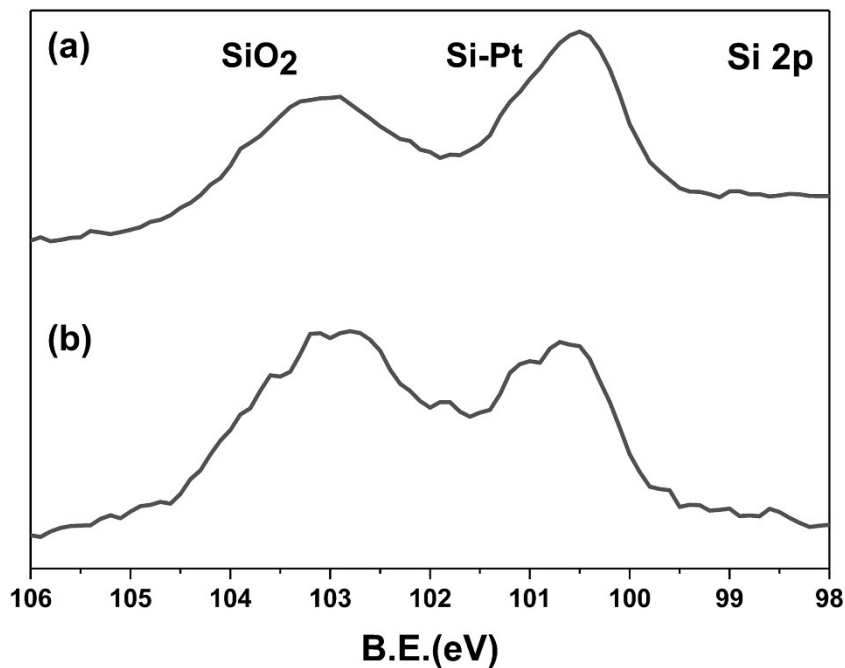

**Fig. S7** Si 2p XPS spectra recorded from the photoelectrode before and after ESR. (a) DS PtSi/p-Si photocathode, (b) Pt<sub>x(x=2,3)</sub>Si/PtSi/p-Si photocathode.

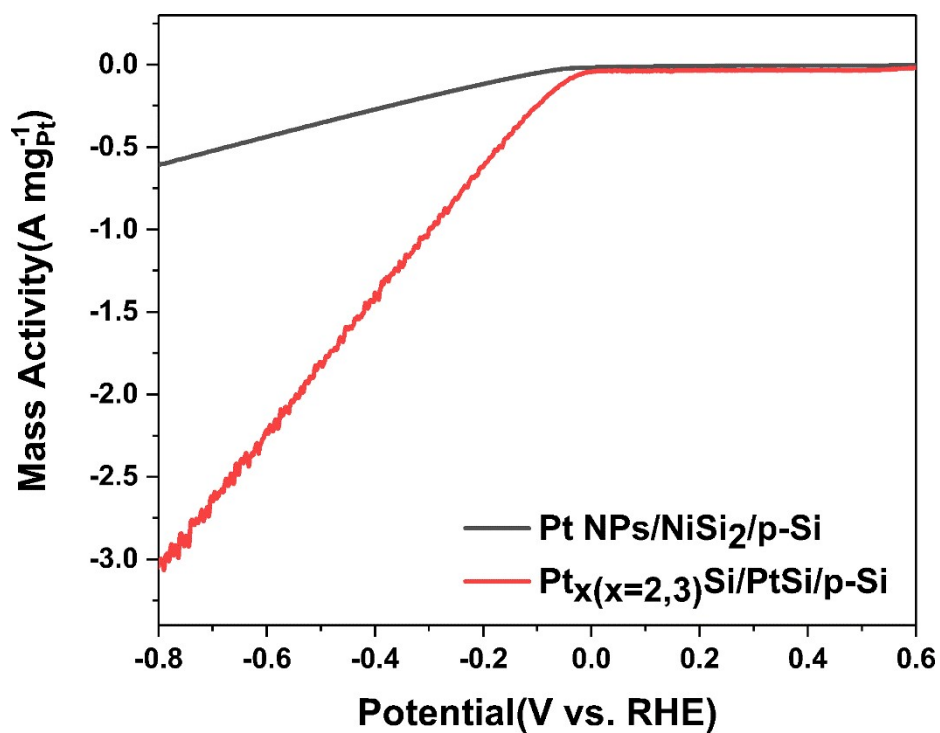

**Fig.S8** Mass electrochemical activity of the Pt<sub>x(x=2,3)</sub>Si/PtSi electrode (red) and Pt NPs/NiSi<sub>2</sub> electrode (black) in 0.5 M H<sub>2</sub>SO<sub>4</sub> electrolyte.

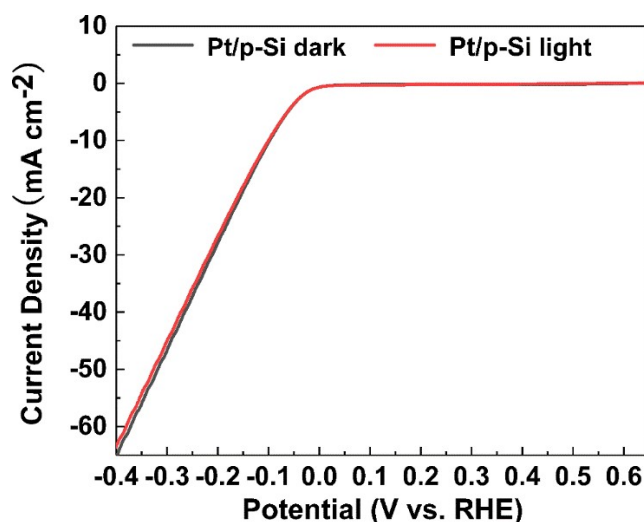

**Fig. S9** LSV curves of the Pt/p-Si measured in 0.5 M H<sub>2</sub>SO<sub>4</sub> solution in dark and under AM 1.5 illumination with intensity of 100 mW cm<sup>-2</sup>.

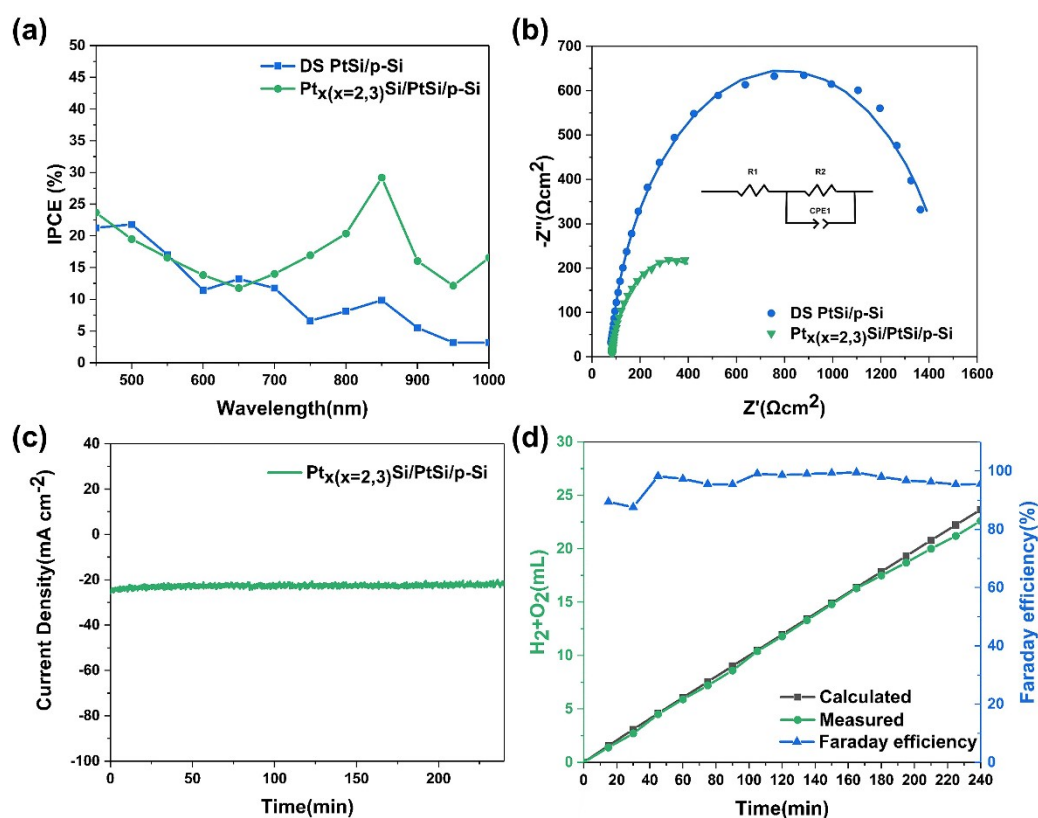

**Fig. S10** (a) IPCE spectra of DS PtSi/p-Si and Pt<sub>x</sub>(x=2,3)Si/PtSi/p-Si in 0.5 M H<sub>2</sub>SO<sub>4</sub> at -0.256 V vs. RHE; (b) EIS spectra of DS PtSi/p-Si (blue) at -0.056 V vs. RHE and Pt<sub>x</sub>(x=2,3)Si/PtSi/p-Si (green) at 0.444V vs. RHE in 0.5 M H<sub>2</sub>SO<sub>4</sub> under illumination. The dots are experimental data and the solid lines are simulation curves based on the equivalent circuit showing in the inset of the figure; (c) Chronoamperometry measurements of the Pt<sub>x</sub>(x=2,3)Si/PtSi/p-Si at -0.056 V vs. RHE in 0.5 M H<sub>2</sub>SO<sub>4</sub> solution under illumination; (d) The measured and theoretical volume of the mixed gas of hydrogen and oxygen generated during the chronoamperometry test and Faraday efficiency.

## Supplementary Table

Summary various representative Si-based photocathodes without p-n junction applying Pt catalyst (NP:nanoparticles; NW:nanowires; NR:nanorods)

| Structure                               | Onset potential (V vs. RHE) | Current densities at 0 V vs. RHE (mA cm <sup>-2</sup> ) | Saturated photocurrent (mA cm <sup>-2</sup> ) | ABPE (%) | References |
|-----------------------------------------|-----------------------------|---------------------------------------------------------|-----------------------------------------------|----------|------------|
| Pt NP/p-Si                              | 0.3                         | -10                                                     | -10                                           |          | 5          |
| Pt NP/p-Si                              | 0.24                        | -2                                                      | -2                                            |          | 6          |
| Pt NP/p-Si NW                           | 0.4                         | -17                                                     | -17                                           |          | 7          |
| Pt NP/TiO <sub>2</sub> NW/p-Si          | 0.25                        | -20.7                                                   | -30                                           |          | 8          |
| Pt NP/SiO <sub>x</sub> NW/p-Si          | 0.35                        | -9.1                                                    | -10                                           |          | 9          |
| Pt/p-Si NW                              | 0.48                        | -12.8                                                   | -14.3                                         | 1.2      | 10         |
| Pt/Ti/SiO <sub>2</sub> /p-Si            | 0.5                         | -18                                                     | -20                                           | 2.9      | 11         |
| Pt/TiO <sub>2</sub> NR/p-Si             | 0.44                        | -40                                                     | -40                                           | 2.5      | 12         |
| Pt/Al <sub>2</sub> O <sub>3</sub> /p-Si | 0                           | 0                                                       | -27                                           |          | 13         |
| Pt/Ti/SrTiO <sub>3</sub> /p-Si          | 0.45                        | -15                                                     | -35                                           | 4.9      | 14         |
| TiO <sub>2</sub> /Pt NP/p-Si            | 0.37                        | -7.5                                                    | -27                                           |          | 15         |
| SiO <sub>x</sub> /Pt/p-Si               | 0.2                         | -30                                                     | -33                                           |          | 16         |
| Pt/Graphene/p-Si                        | 0.4                         | -32                                                     | -32                                           |          | 17         |
| Ag-Pt/SiO <sub>x</sub> /p-Si            | 0.36                        | -30                                                     | -35                                           |          | 18         |
| Pt NP/NiSi <sub>2</sub> /p-Si           | 0.53                        | -36                                                     | -37                                           | 5.2      | 19         |
| Pt <sub>x(x=2,3)</sub> Si/PtSi/p-Si     | 0.54                        | -30                                                     | -30                                           | 5.8      | This work  |

## References

1. S. Li, G. She, C. Chen, S. Zhang, L. Mu, X. Guo and W. Shi, *ACS Appl. Mater. Interfaces*, 2018, **10**, 8594-8598.
2. J. Luo, Z. Qiu, J. Deng, C. Zhao, J. Li, W. Wang, D. Chen, D. Wu, M. Östling, T. Ye and S. Zhang, *Microelectron Eng*, 2014, **120**, 174-177.
3. R. Fan, Z. Mi and M. Shen, *Opt. Express*, 2019, **27**, A51-A80.
4. S. Li, H. Zhang, G. She, J. Xu, S. Zhang, Y. Deng, L. Mu, Q. Zhou, Y. Liu, J. Luo and W. Shi, *ACS Applied Energy Materials*, 2021, **4**, 11574-11579.
5. C. U. Maier, M. Specht and G. Bilger, *Int. J. Hydrogen Energy*, 1996, **21**, 859-864.
6. I. Lombardi, S. Marchionna, G. Zangari and S. Pizzini, *Langmuir*, 2007, **23**, 12413-12420.
7. I. Oh, J. Kye and S. Hwang, *Nano Lett.*, 2012, **12**, 298-302.

- 
8. N. P. Dasgupta, C. Liu, S. Andrews, F. B. Prinz and P. Yang, *J. Am. Chem. Soc.*, 2013, **135**, 12932-12935.
  9. P. Dai, J. Xie, M. T. Mayer, X. Yang, J. Zhan and D. Wang, *Angew. Chem., Int. Ed. Engl.*, 2013, **52**, 11119-11123.
  10. U. Sim, H.-Y. Jeong, T.-Y. Yang and K. T. Nam, *J Mater Chem A*, 2013, **1**, 5414-5422.
  11. D. V. Esposito, I. Levin, T. P. Moffat and A. A. Talin, *Nat. Mater.*, 2013, **12**, 562-568.
  12. D. M. Andoshe, S. Choi, Y.-S. Shim, S. H. Lee, Y. Kim, C. W. Moon, D. H. Kim, S. Y. Lee, T. Kim, H. K. Park, M. G. Lee, J.-M. Jeon, K. T. Nam, M. Kim, J. K. Kim, J. Oh and H. W. Jang, *J Mater Chem A*, 2016, **4**, 9477-9485.
  13. M. J. Choi, J. Y. Jung, M. J. Park, J. W. Song, J. H. Lee and J. H. Bang, *J Mater Chem A*, 2014, **2**, 2928-2933.
  14. L. Ji, M. D. McDaniel, S. Wang, A. B. Posadas, X. Li, H. Huang, J. C. Lee, A. A. Demkov, A. J. Bard, J. G. Ekerdt and E. T. Yu, *Nat. Nanotechnol.*, 2015, **10**, 84-90.
  15. S. Li, P. Zhang, X. Song and L. Gao, *ACS Appl. Mater. Interfaces*, 2015, **7**, 18560-18565.
  16. N. Y. Labrador, X. Li, Y. Liu, H. Tan, R. Wang, J. T. Koberstein, T. P. Moffat and D. V. Esposito, *Nano Lett.*, 2016, **16**, 6452-6459.
  17. C. K. Ku, P. H. Wu, C. C. Chung, C. C. Chen, K. J. Tsai, H. M. Chen, Y. C. Chang, C. H. Chuang, C. Y. Wei, C. Y. Wen, T. Y. Lin, H. L. Chen, Y. S. Wang, Z. Y. Lee, J. R. Chang, C. W. Luo, D. Y. Wang, B. J. Hwang and C. W. Chen, *Adv. Energy Mater.*, 2019, **9**, 1901022-1901031.
  18. S. Y. Lim, K. Ha, H. Ha, S. Y. Lee, M. S. Jang, M. Choi and T. D. Chung, *Phys. Chem. Chem. Phys.*, 2019, **21**, 4184-4192.
  19. S. Li, H. Zhang, G. She, J. Xu, S. Zhang, Y. Deng, L. Mu, Q. Zhou, Y. Liu, J. Luo and W. Shi, *ACS Applied Energy Materials*, 2021, DOI: 10.1021/acsaem.1c02318.
